# Supplementary material for: Involvement of Lophodermella sulcigena in Endemic Disease of Pinus mugo Needles in the Polish Tatra Mountains
Source: MDPI journal article supplement (doi:10.3390/f15030422), 2024-02-22
Supplement: s1 [file s1]

Archive with 1 entries (1 files):
- forests-2841344-supplementary.pdf
