# Supplementary material for: Involvement of Lophodermella sulcigena in Endemic Disease of Pinus mugo Needles in the Polish Tatra Mountains
Source: MDPI journal article supplement (doi:10.3390/f15030422), 2024-02-22
Supplement: s1 [file s1 › forests-2841344-supplementary.pdf]

**Table S1.** Characteristics of *Pinus mugo* needles with disease symptoms from previous year and current year, studied in 2016 in Chochołowska Valley (Tatra Mountains)

| Analyzed Samples,<br>Term                                                                       | Previous Year Needles,<br>July 2016, 14 Twigs |                               |                      | Current Year Needles,<br>September 2016, 7 Twigs |                      |                      |
|-------------------------------------------------------------------------------------------------|-----------------------------------------------|-------------------------------|----------------------|--------------------------------------------------|----------------------|----------------------|
|                                                                                                 | main<br>shoots                                | lateral<br>shoots             | total                | main shoots                                      | lateral<br>shoots    | total                |
| Shoots types                                                                                    |                                               |                               |                      |                                                  |                      |                      |
| Number of double<br>needles analyzed                                                            | 1639                                          | 431                           | 2070                 | 625                                              | 1182                 | 1807                 |
| Average number of<br>needles per 1 cm<br>(min/max)                                              | 11.4<br>(9.6/15.7)                            | 5.5<br>(4.3/6.5)              | 8,3<br>(4.3/15.7)    | 11,6<br>(7.4/14)                                 | 8.7<br>(6.6/11,8)    | 10.6<br>(6.6/14.0)   |
| Average length of<br>green needles (cm)<br>(min/max)                                            | 5.0 <sup>1</sup><br>(3.8/6.5)                 | 4.5 <sup>1</sup><br>(3.7/5.7) | 4.8<br>(3.7/6.5)     | 4.2 <sup>1</sup><br>(3.7/4.8)                    | 4.2<br>(3.4/5.0)     | 4.2<br>(3.4/5.0)     |
| Average length of<br>discolored needles<br>(cm)<br>(min/max)                                    | 4.2 <sup>1</sup><br>(2.1/6.5)                 | 4.9 <sup>1</sup><br>(4.2/5.9) | 4.6<br>(2.1/6.5)     | 3.0 <sup>1</sup><br>(1.9/4.8)                    | 4.2<br>(3.6/5.5)     | 3.6<br>(1.9/5.5)     |
| % of discolored<br>needles<br>(min/max) including:                                              | 54.1<br>(11.5/96.2)                           | 77.2<br>(57.1/100.0)          | 65.8<br>(11.5/100.0) | 66.7<br>(16.9/100.0)                             | 89.0<br>(72.9/100.0) | 77.8<br>(16.9/100.0) |
| one discolored needle                                                                           | 33.1                                          | 36.6                          | 35.0                 | 41.0                                             | 45.0                 | 43.0                 |
| both discolored<br>needles                                                                      | 21.0                                          | 40.6                          | 30.8                 | 25.7                                             | 44.0                 | 35.0                 |
| % of needles<br>discolored above ¾<br>length                                                    | 49.8                                          | 71.5                          | 60.7                 | 40.8                                             | 78.5                 | 59.7                 |
| % of needles with<br>white-gray<br>discoloration<br>(with ascomata of <i>L.<br/>sulcigena</i> ) | 43.0<br>(34.4)                                | 64.4<br>(47.7)                | 53.5<br>(41.6)       | 29.4<br>(2.2)                                    | 61.8<br>(4.7)        | 45.0<br>(3.4)        |

<sup>1</sup> Marked values in the same columns differ statistically (t-test, p=0.05)
